# Supplementary material
Source: MDPI journal article supplement (https://www.mdpi.com/2073-4441/14/24/4098)
Supplement: s1 [file s1 › water-2055110-supplementary.pdf]

Supplementary Information for:

## Impacts of Climate Change Induced Sea Level Rise, Flow Increase and Vegetation Encroachment on Flood Hazard in the Biobío River, Chile

Gerhard Schoener <sup>1\*</sup>, Enrique Muñoz <sup>2,3</sup>, José Luis Arumí <sup>4,5</sup> and Mark C. Stone <sup>6</sup>

<sup>1</sup> Southern Sandoval County Arroyo Flood Control Authority, 1041 Commercial Dr SE, Rio Rancho, NM 87124, USA

<sup>2</sup> Department of Civil Engineering, Universidad Católica de la Santísima Concepción, Concepción 4030000, Chile; emunozo@ucsc.cl

<sup>3</sup> Centro de Investigación en Biodiversidad y Ambientes Sustentables (CIBAS), Universidad Católica de la Santísima Concepción, Concepción 4030000, Chile

<sup>4</sup> Water Resources Department, Faculty of Agricultural Engineering, Universidad de Concepción, Chillan 3812120, Chile; jarumi@udec.cl

<sup>5</sup> Water Research Center for Agricultural and Mining (CRHIAM), Universidad de Concepción, Concepción 4090541, Chile

<sup>6</sup> Department of Civil, Construction and Environmental Engineering, University of New Mexico, Albuquerque, NM 87131, USA; stone@unm.edu

\* Correspondence: gschoener@sscafca.com

Table S1: Calculated recurrence intervals and associated peak flows and 95% confidence limits for the lower Biobío River based on annual maximum time series using the method outlined in USGS Bulletin 17.

| Chance<br>Exceedance<br>% | Recurrence<br>Interval<br>y | Flow<br>m <sup>3</sup> s <sup>-1</sup> | Confidence limits                      |                                        |
|---------------------------|-----------------------------|----------------------------------------|----------------------------------------|----------------------------------------|
|                           |                             |                                        | 0.05<br>m <sup>3</sup> s <sup>-1</sup> | 0.95<br>m <sup>3</sup> s <sup>-1</sup> |
| 0.2                       | 500                         | 18,959                                 | 32,610                                 | 14,164                                 |
| 0.5                       | 200                         | 17,162                                 | 26,697                                 | 13,429                                 |
| 1                         | 100                         | 15,715                                 | 22,784                                 | 12,722                                 |
| 2                         | 50                          | 14,184                                 | 19,267                                 | 11,838                                 |
| 5                         | 20                          | 12,009                                 | 15,074                                 | 10,304                                 |
| 10                        | 10                          | 10,222                                 | 12,198                                 | 8827                                   |
| 20                        | 5                           | 8265                                   | 9608                                   | 7127                                   |
| 50                        | 2                           | 5207                                   | 6092                                   | 4425                                   |
| 80                        | 1.25                        | 3037                                   | 3619                                   | 2331                                   |
| 90                        | 1.11                        | 2219                                   | 2723                                   | 1462                                   |
| 95                        | 1.05                        | 1684                                   | 2159                                   | 922                                    |
| 99                        | 1.01                        | 961                                    | 1411                                   | 328                                    |

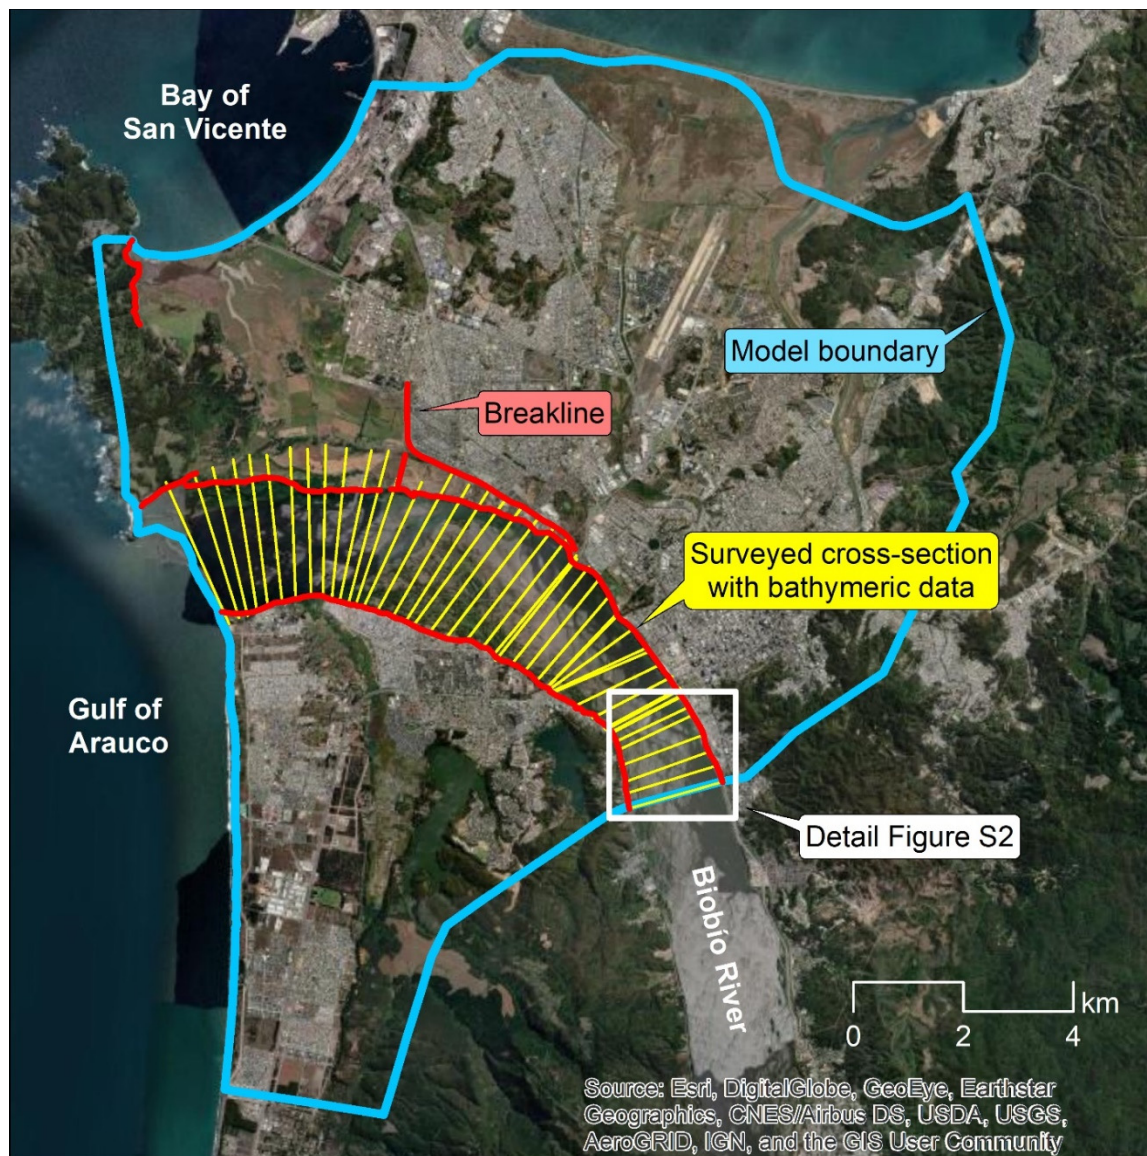

Figure S1: Map of the study area showing the boundary of the hydrodynamic model (blue), breaklines used to refine the computational mesh (red), and locations of surveyed cross-sections (yellow).

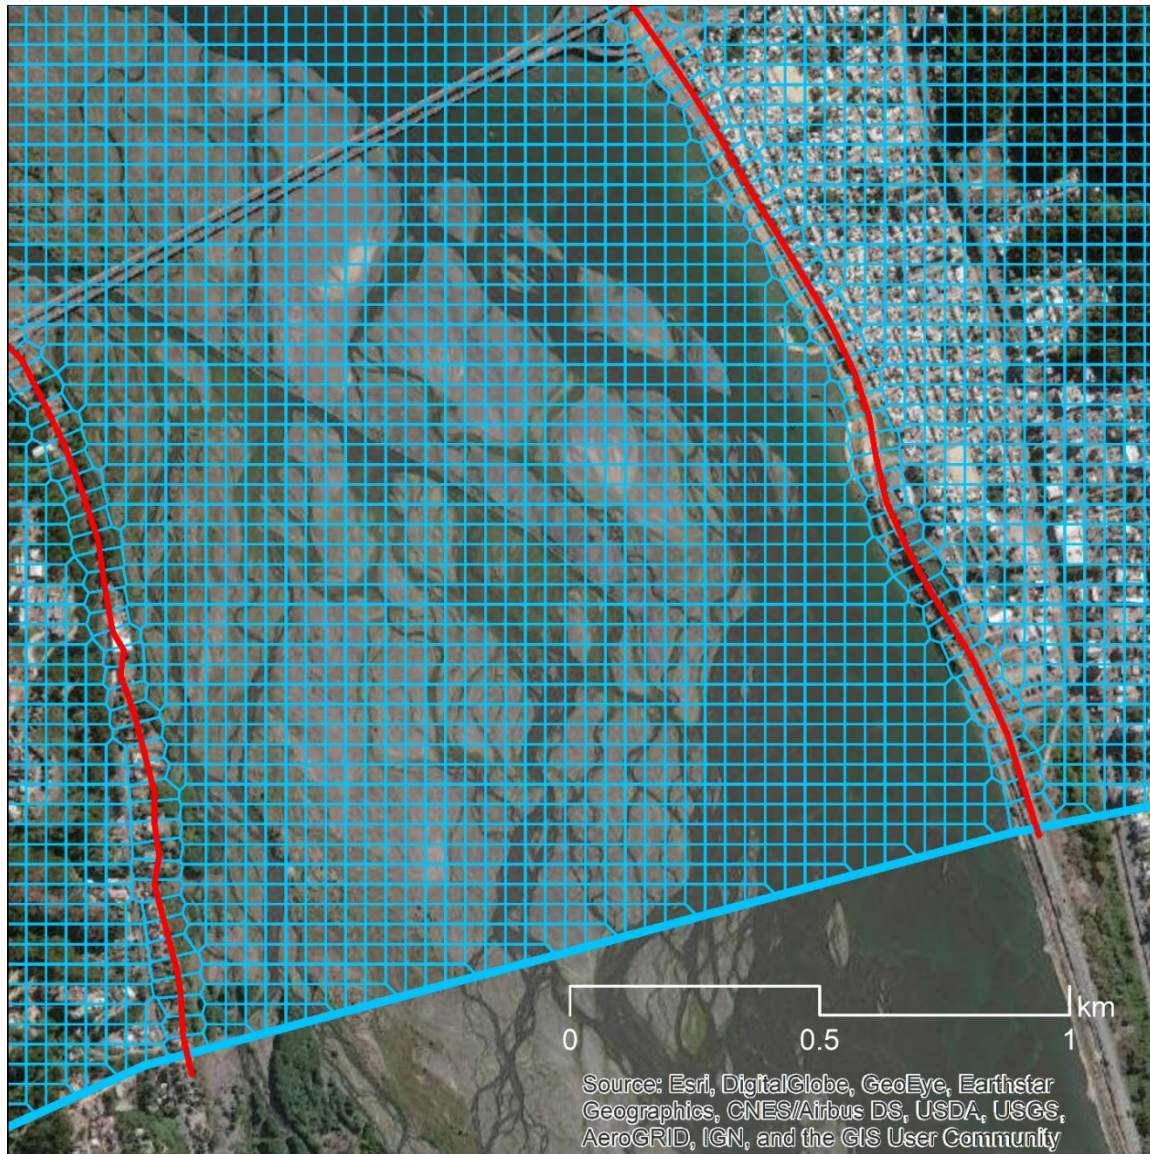

Figure S2: Detailed view of a portion of the computational mesh (blue) and refinement regions along the banks of the Biobío River (red).

Table S2: Manning's  $n$ -values for different land use types.

| Land use      | $n$ -value | Land use                   | $n$ -value |
|---------------|------------|----------------------------|------------|
| barren land   | 0.027      | shrubland                  | 0.120      |
| dunes         | 0.030      | forest                     | 0.140      |
| river channel | 0.032      | dense riparian forest      | 0.160      |
| pasture/field | 0.040      | urban area, low density    | 0.080      |
| wetland       | 0.050      | urban area, medium density | 0.120      |
| scrubland     | 0.070      | urban area, high density   | 0.160      |

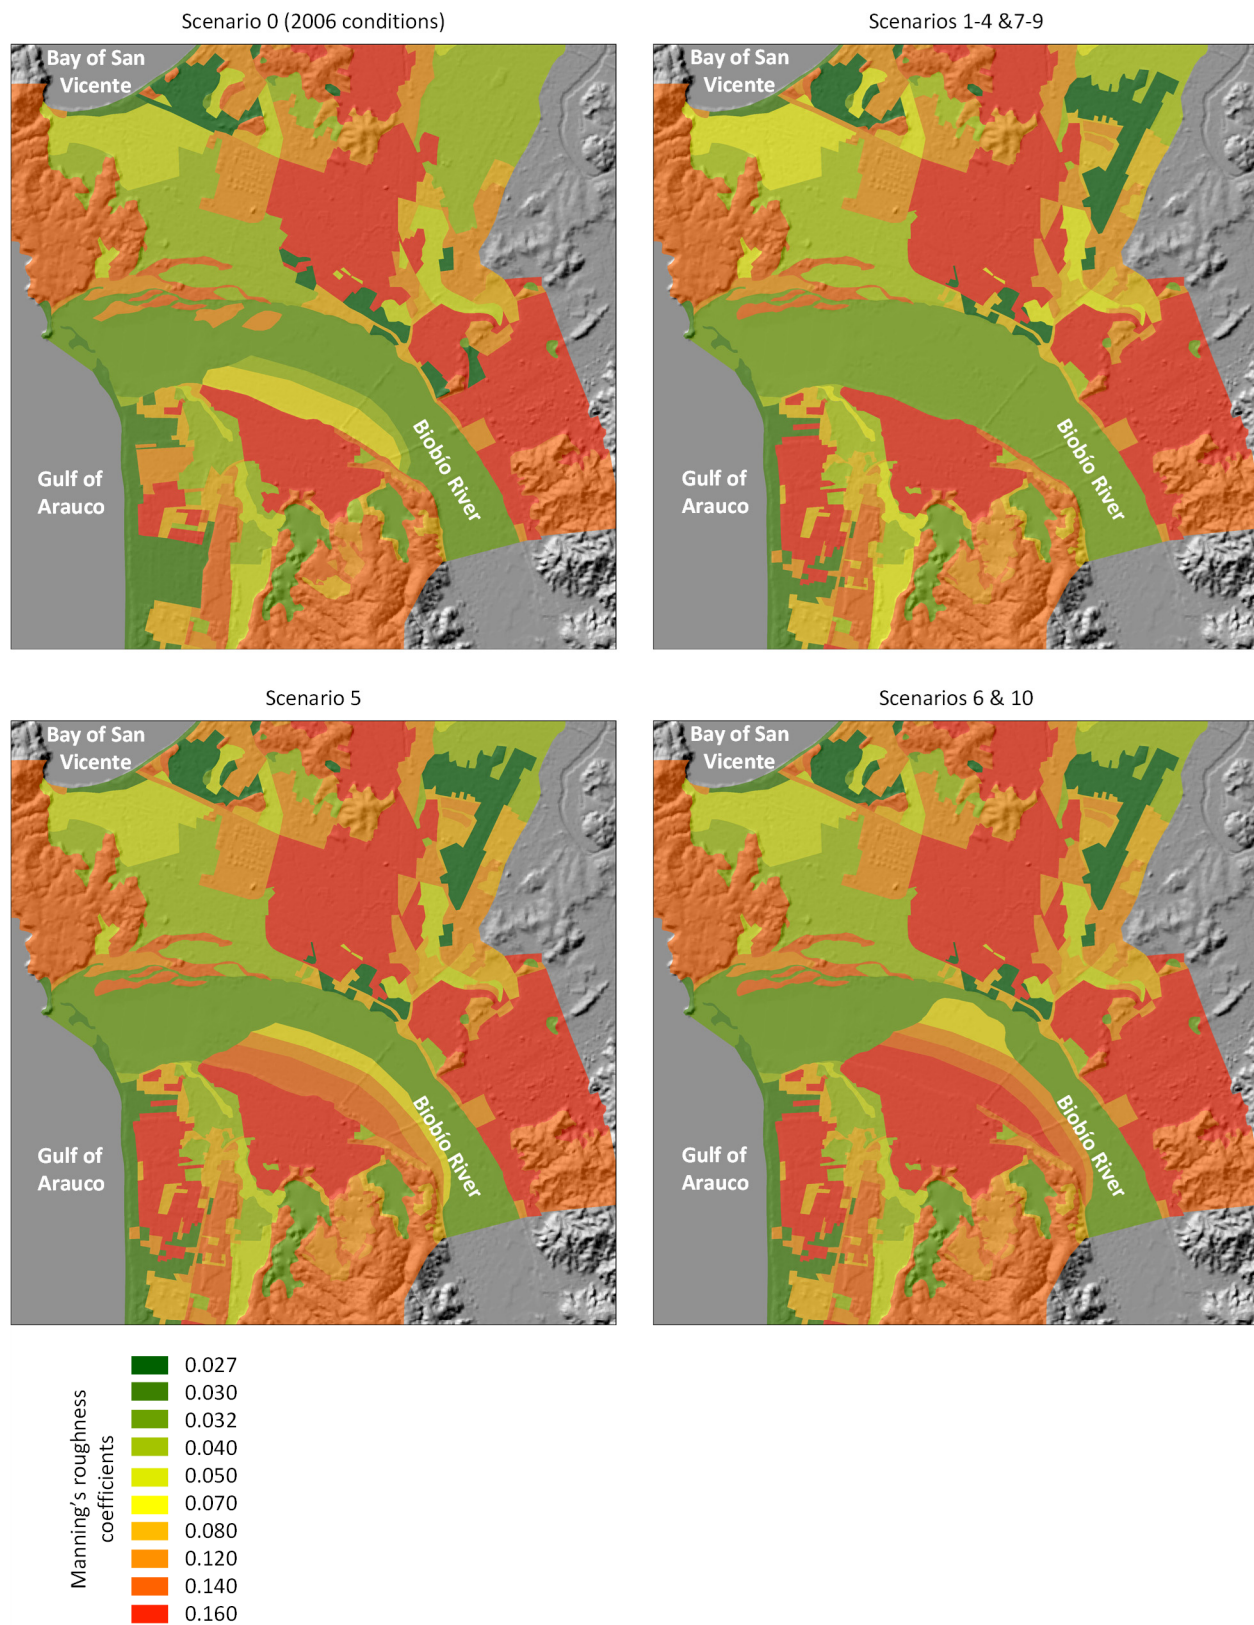

Figure S3: Manning's  $n$ -values for different model scenarios.

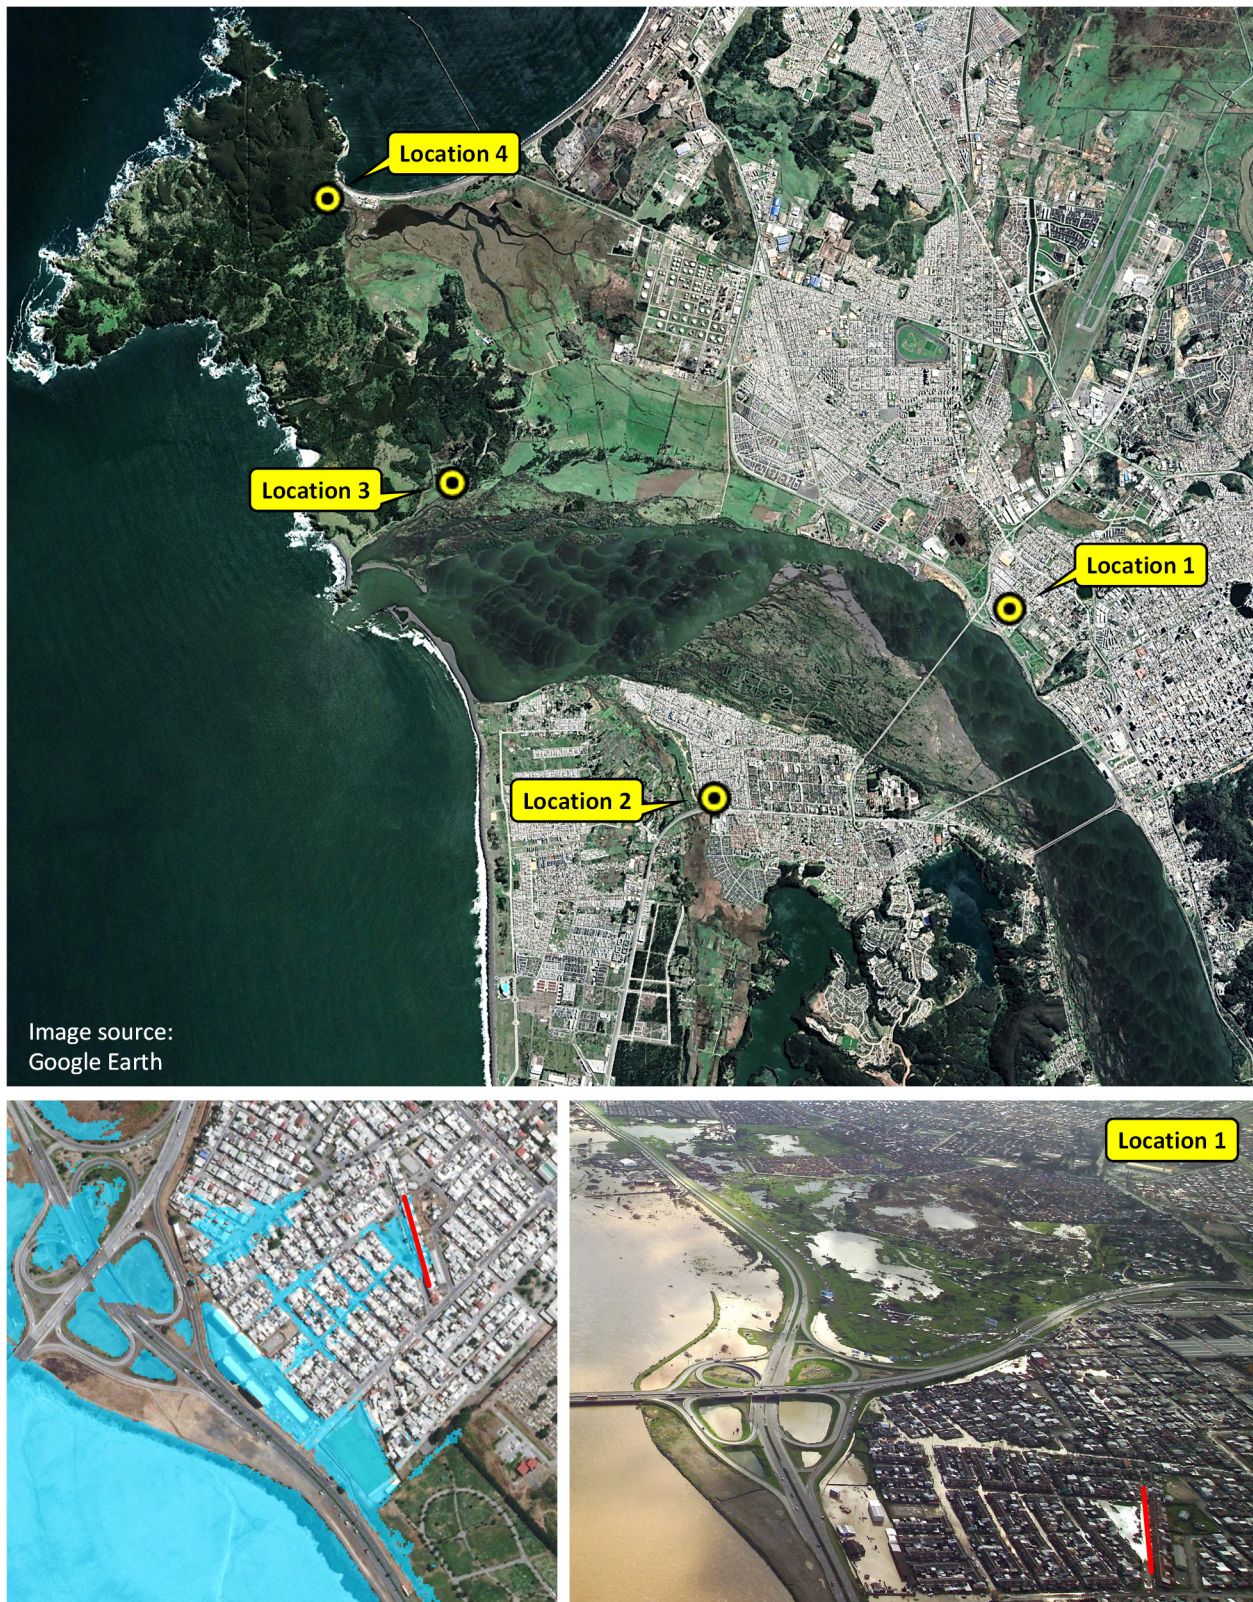

Figure S4: Overview map (top) showing locations where modeled and observed flood extent for the 2006 flood were compared, and comparison at location 1 (bottom; see red line for comparison; image source: Didier Rousset Buy).

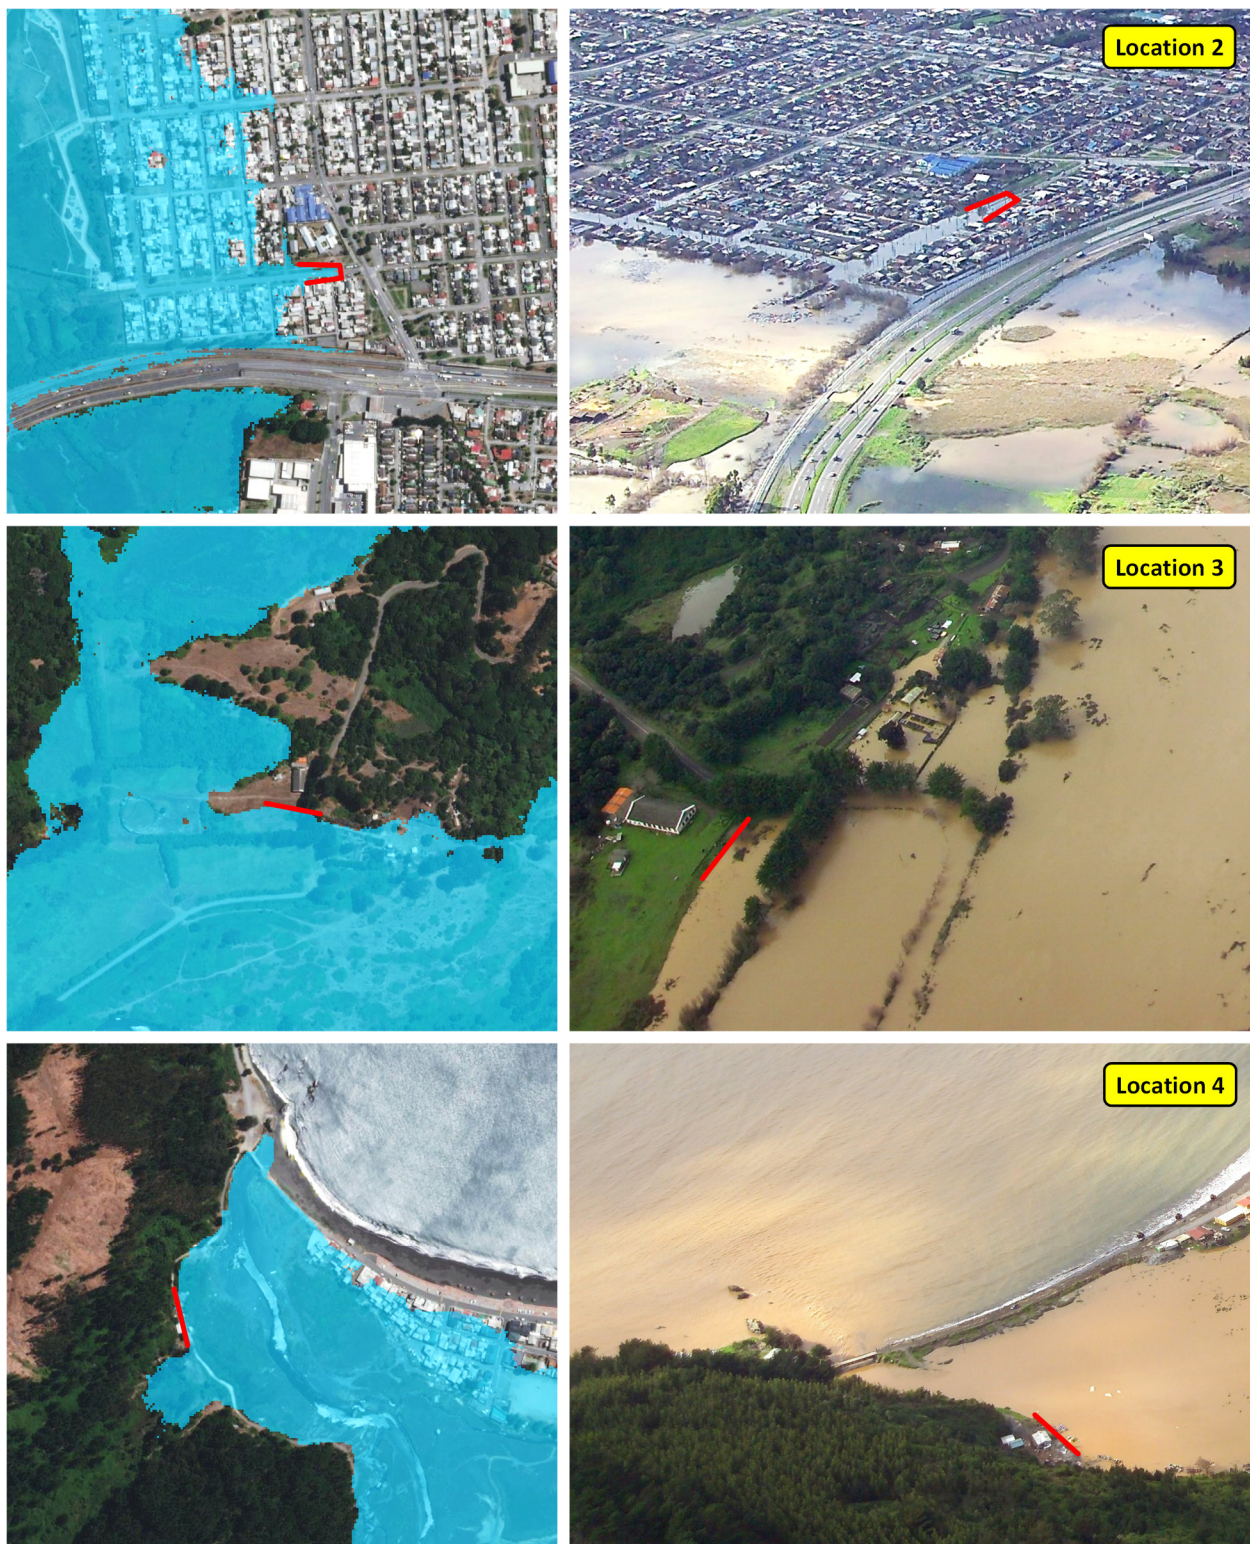

Figure S5: Comparison of modeled (left) and observed flood extents (right) at locations 2, 3 and 4 (see red line for comparison; image source: Didier Rousset Buy).

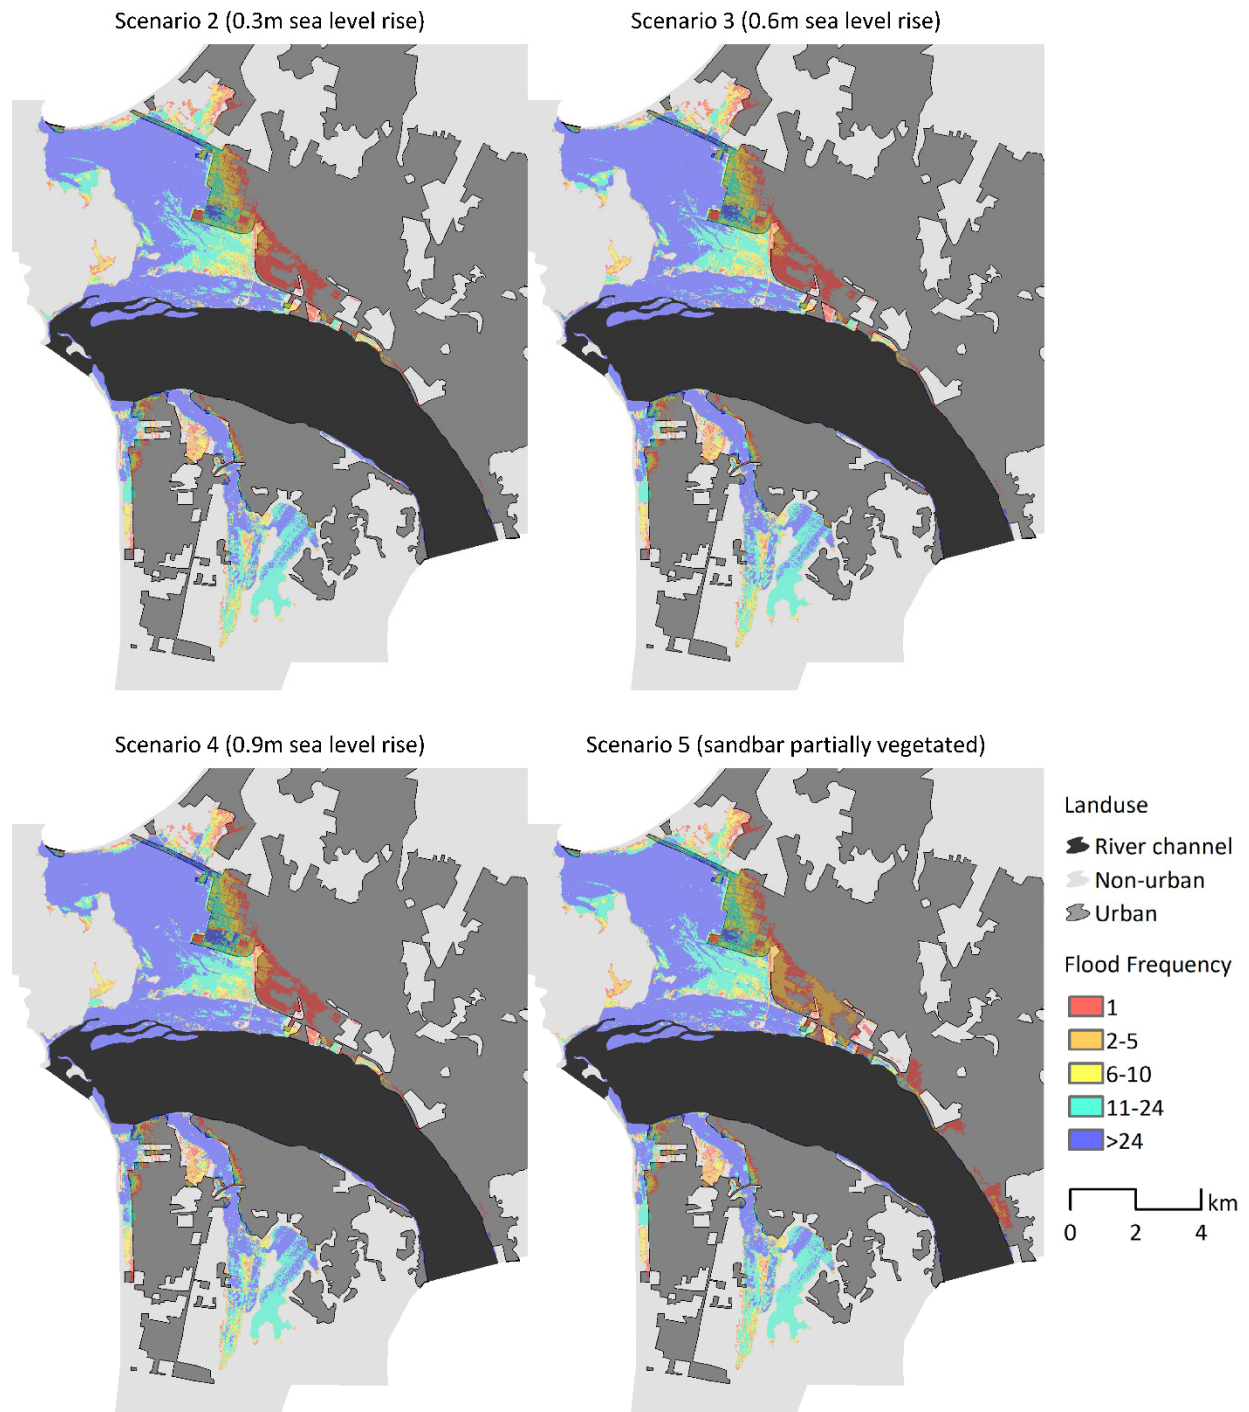

Figure S6: Maps showing frequency of flooding in the study area based on 32 flood events for scenarios 2-5. The river channel is indicated with black shading; areas urbanized in 2022 are indicated with a darker shade of grey.

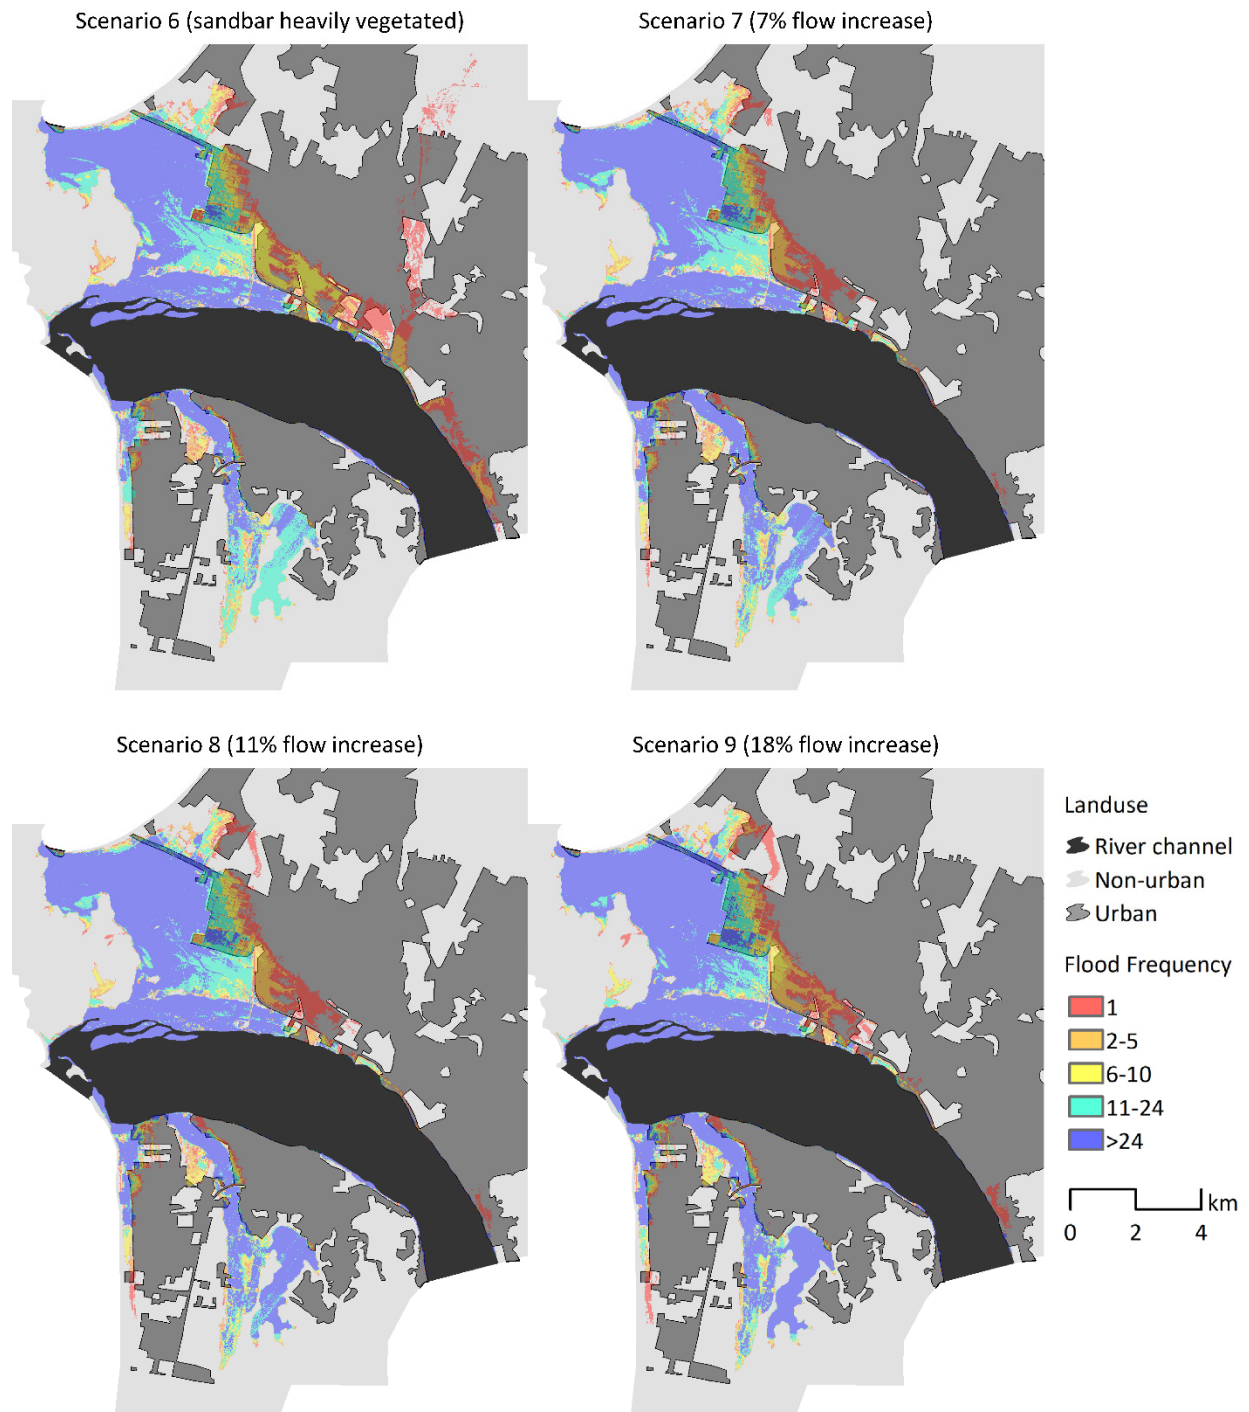

Figure S7: Maps showing frequency of flooding in the study area based on 32 flood events for scenarios 6-9. The river channel is indicated with black shading; areas urbanized in 2022 are indicated with a darker shade of grey.

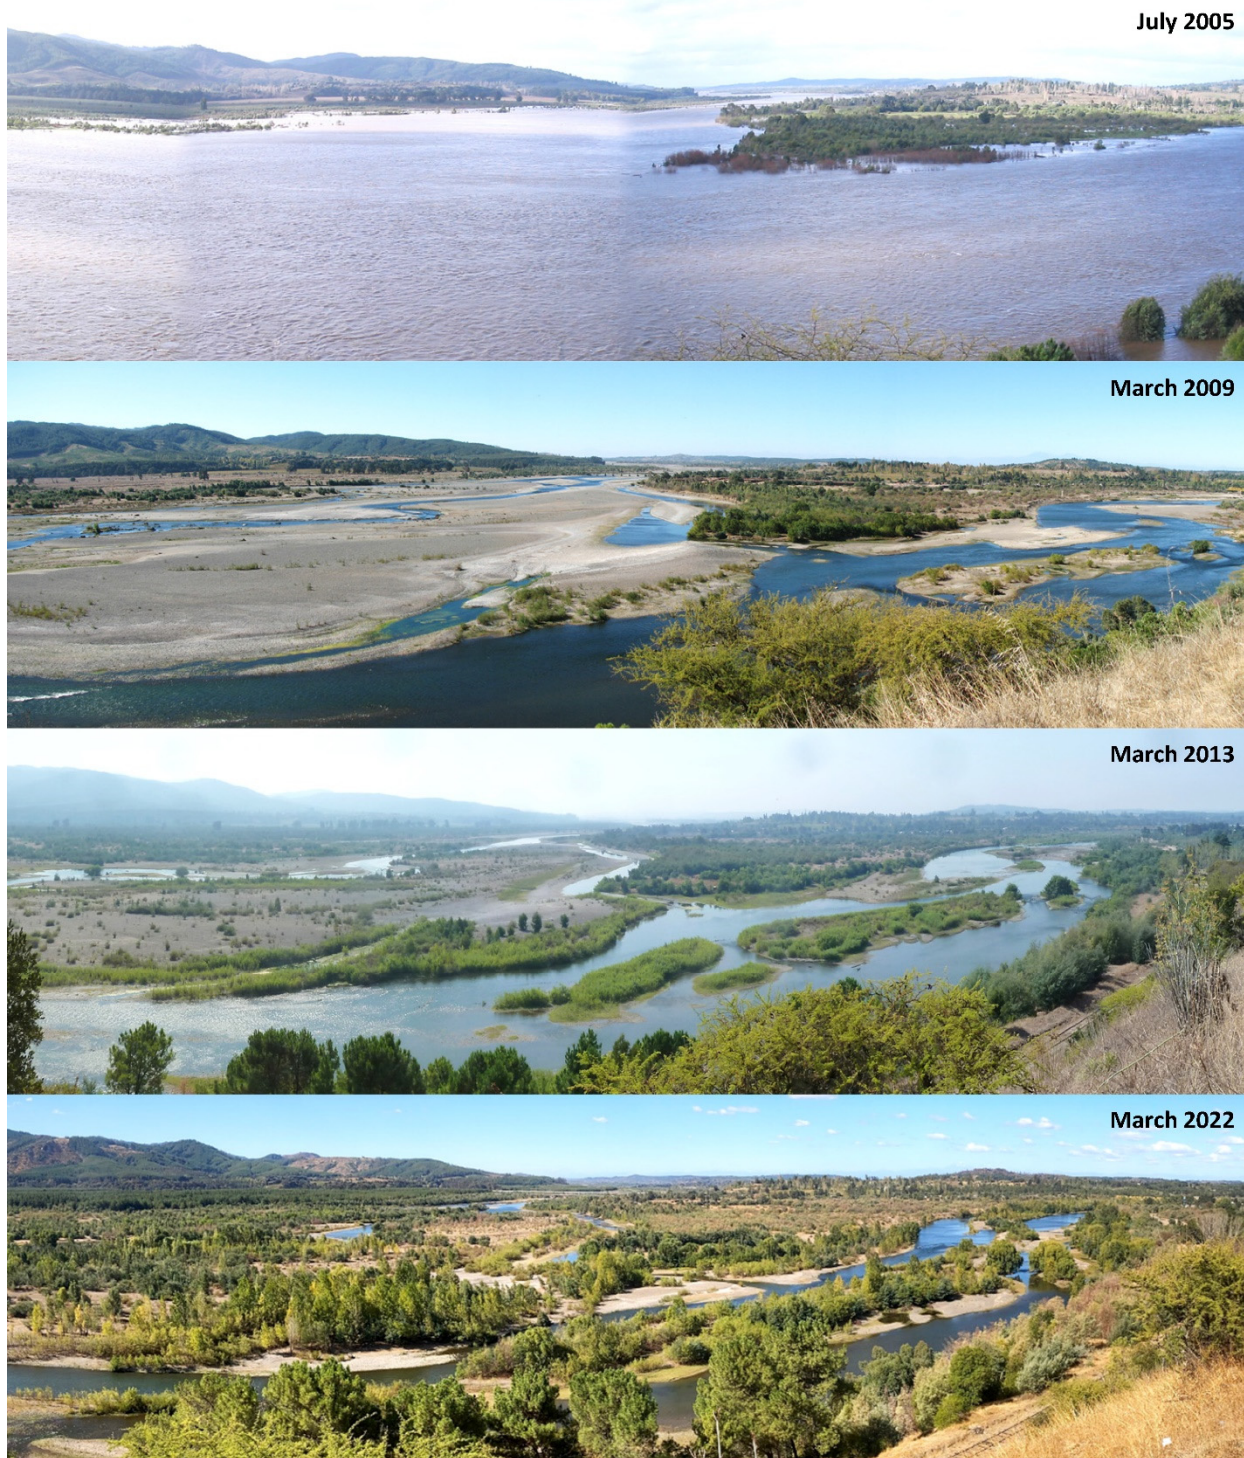

Figure S8: Photos showing the confluence of the Ñuble and Itata Rivers (Latitude:  $-36.642239^\circ$ , Longitude:  $-72.466197^\circ$ ) in central Chile in 2006, 2009, 2013 and 2022 (image source: José Luis Arumí).
